# Supplementary material for: Heterogeneity of Metabolic Defects in Type 2 Diabetes and Its Relation to Reactive Oxygen Species and Alterations in Beta-Cell Mass
Source: Front Physiol. 2019 Feb 13;10:107. doi: 10.3389/fphys.2019.00107 (PMC6383038; doi:10.3389/fphys.2019.00107)
Supplement: Supplementary file 1 [file Table_1.xlsx]

## Sheet: Blad1
Suplementary Table 1. Comparison of novel attempts to classify diabetes. Li et al. used 73 phenotypic features in electric medical records (EMR) to identify three subtypes to T2D and then isolated single nucleotide polymorphisms (SNP) associated to each subtype. Ahlqvist et al. used a data driven cluster analysis of six diabetogenic variables and identified five clusters (one with autoimmune diab…
Author	Year	Design	Follow-up (years)	Ethnicities	Participants (N)	Classification method	Phenotypes	Genetics	Comorbidity	Comment
Li L. et al.	2015	Retrospective register study	N/A	Genetic material from all continents	2,551 with T2D	Data-driven analysis 73 phenotypic features registered in EMR resulted in 3 patient-patient cluster nodes. Then identification of SNP associated with each of the three cluster nodes.	Subtype 1 (30%): Youngest, highest BMI and plasma-glucose	Subtype 1: 27 gene-phenotype associations.	Subtype 1: nephropathy, retinopathy.	Replication in same cohort by randomly splitting the groups into training and test sets.
							Subtype 2 (24%): Lowest BMI.	Subtype 2: 25 gene-phenotype associations.	Subtype 2: CVD, cancer
							Subtype 3: Hypertension and hyperlipidemia	Subtype 3: 28 gene-phenotype associations.	Subtype 3: CVD, neurological disease, allergy, HIV
Ahlqvist E. et al.	2018	Cohort	4	European	8,980 newly diagnosed with diabetes	Data-driven cluster analysis of six diabetogenic variables	Cluster 1 (6%): severe autoimmune diabetes (SAID)	Cluster 1: rs2854275 variant in the HLA locus		Based on easily accessable variables that facilitate use in primary healthcare. Replicated in three separate cohorts. Cluster belonging may change over time.
							Cluster 2 (18%): Severe insulin deficient diabetes (SIDD)	Cluster 2: TCF7L2	Retinopathy
							Cluster 3 (15%): Severe insulin resistant diabetes (SIRD)	Cluster 3: rs10401969 variant in the TM6SF2 gene	NAFLD, CKD
							Cluster 4 (22%): Mild obesity-related diabetes (MOD)	Cluster 4: TCF7L2
							Cluster 5 (39%): Mild age-related diabetes (MARD)	Cluster 5: TCF7L2
Udler MS. et al.	2018	Cross-section	N/A	European	17,365 with T2D	Bayesian nonnegative factorisation clustering of 94 germline diabetes associated SNP and 47 metabolic traits.	Cluster 1: Beta-cell dysfunction and increased pro-insulin	Cluster 1: MTNR1B, HHEX, TCF7L2, SLC30A8, HNF1A and HNF1B		Combines genotype and phenotype. Targets causative mechanisms behind diabetes. Difficult to implement in primary healthcare
							Cluster 2: Beta-cell dysfunction and decreased proinsulin	Cluster 2: ARAP1, SPRY2
							Cluster 3: High insulin resistance, precent body fat, WC, HC and BMI	Cluster 3: FTO, MC4R
							Cluster 4: High insulin resistance, low insulin sensitivity index, adiponectin and HDL. Elevated triglycerides	Cluster 4: PPARG, ANKRD55, ARL15, GRB14, IRS1 and LYPLAL1
							Cluster 5: Highh insulin resistance, decreased TG
